# Supplementary material for: Rhizospheric Microflora Escalating Aroma Constituents and Yield Attributes inOcimum tenuiflorum(L.) cv. CIM-Ayu
Source: Hindawi journal article supplement (doi:10.1155/2014/621912), 2014-01-01
Supplement: f1 [file 621912.f1.xlsx]

## Sheet: Sheet1
		Data for Table 2A
				T1	T2	T3	T4	T5	T6	T7	T8
			Shoot length
			1	71	79	88	78	82	85	91	96
			2	70	76	86	80	81	86	92	95
			3	72	80	89	76	82	86	92	96
			Mean	71	78.3333	87.6667	78	81.6667	85.6667	91.6667	95.6667
			St Dev	1	2.08167	1.52753	2	0.57735	0.57735	0.57735	0.57735
			St Error	0.577367	1.20189	0.881943	1.15473	0.333343	0.333343	0.333343	0.333343
			Root F.weight
			1	5.5	6.5	8.5	7	8	8.5	9	9.5
			2	5	6.5	8	7.5	7	9	9.5	10
			3	5.5	7	8.5	7	8	8.5	9	9.5
			Mean	5.33333	6.66667	8.33333	7.16667	7.66667	8.66667	9.16667	9.66667
			St Dev	0.288675	0.288675	0.288675	0.288675	0.57735	0.288675	0.288675	0.288675
			St Error	0.166672	0.166672	0.166672	0.166672	0.333343	0.166672	0.166672	0.166672
			Root Length
			1	10	12	14	13	13.5	14	15	15.5
			2	9	12	13	13.5	13	15	14	15
			3	10	13	14.5	13	13.5	14	14.5	15.5
			Mean	9.66667	12.3333	13.8333	13.1667	13.3333	14.3333	14.5	15.3333
			St Dev	0.57735	0.57735	0.763763	0.288675	0.288675	0.57735	0.5	0.288675
			St Error	0.333343	0.333343	0.440971	0.166672	0.166672	0.333343	0.288684	0.166672
			Leaf F.weight
			1	158	175	184	180	185	196.5	201	210
			2	163.5	178	186	182	188	197	205	209
			3	161	182	187.5	182.5	188.5	196	204.5	211
			Mean	160.833	178.333	185.833	181.5	187.167	196.5	203.5	210
			St Dev	2.75379	3.51188	1.75594	1.32288	1.89297	0.5	2.17945	1
			St Error	1.58995	2.02765	1.01382	0.763785	1.09294	0.288684	1.25834	0.577367
			% essential oilyield
			1	0.55	0.6	0.67	0.6	0.65	0.71	0.77	0.78
			2	0.58	0.61	0.66	0.61	0.67	0.72	0.78	0.78
			3	0.56	0.63	0.67	0.6	0.68	0.7	0.77	0.77
			Mean	0.563333	0.613333	0.666667	0.603333	0.666667	0.71	0.773333	0.776667
			St Dev	0.0152753	0.0152753	0.0057735	0.0057735	0.0152753	0.01	0.0057735	0.0057735
			St Error	0.00881943	0.00881943	0.00333343	0.00333343	0.00881943	0.00577367	0.00333343	0.00333343
			Data for Table 3A
	Nitrogen		T1	T2	T3	T4	T5	T6	T7	T8
		1	1.7	2.9	2.6	2.3	2.2	2.1	2.1	3
		2	1.7	2.8	2.65	2.3	2.1	2.1	2.14	2.9
		3	1.6	2.8	2.6	2.2	2.1	2	2.1	2.9
		Mean	1.66667	2.83333	2.61667	2.26667	2.13333	2.06667	2.11333	2.93333
		St Dev	0.057735	0.057735	0.0288675	0.057735	0.057735	0.057735	0.023094	0.057735
		St Error	0.0333343	0.0333343	0.0166672	0.0333343	0.0333343	0.0333343	0.0133337	0.0333343
	Phosphorus	1	0.32	0.28	0.36	0.3	0.25	0.33	0.42	0.43
		2	0.33	0.28	0.36	0.31	0.25	0.34	0.41	0.45
		3	0.31	0.27	0.37	0.31	0.25	0.33	0.41	0.44
		Mean	0.32	0.276667	0.363333	0.306667	0.25	0.333333	0.413333	0.44
		St Dev	0.01	0.0057735	0.0057735	0.0057735	0	0.0057735	0.0057735	0.01
		St Error	0.00577367	0.00333343	0.00333343	0.00333343	0	0.00333343	0.00333343	0.00577367
	Potassium	1	2.27	2.2	1.62	1.92	1.9	2.1	2.36	2.4
		2	2.28	2.4	1.63	1.9	1.8	2.15	2.25	2.3
		3	2.27	2.3	1.61	1.96	1.85	2	2.1	2.3
		Mean	2.27333	2.3	1.62	1.92667	1.85	2.08333	2.23667	2.33333
		St Dev	0.0057735	0.1	0.01	0.0305505	0.05	0.0763763	0.130512	0.057735
		St Error	0.00333343	0.0577367	0.00577367	0.0176389	0.0288684	0.0440971	0.0753532	0.0333343
